# Supplementary material for: Monozygotic twins discordant for constitutive BRCA1 promoter methylation, childhood cancer and secondary cancer
Source: PubMed Central journal article supplement — Epigenetics. 2012 Jan 1;7(1):47–54. doi: 10.4161/epi.7.1.18814 (PMC3329502; doi:10.4161/epi.7.1.18814), 2012-01-01
Supplement: epi-7-47-s1.pdf [file epi-7-47-s1.pdf]

**Supplemental material to:**

Danuta Galetzka, Tamara Hansmann, Nady El Hajj, Eva Weis, Benjamin Irmischer, Marco Ludwig, Brigitte Schneider-Rätzke, Nicolai Kohlschmidt, Vera Beyer, Oliver Bartsch, Ulrich Zechner, Claudia Spix and Thomas Haaf. *Epigenetics* 2012; 7(1);

<http://dx.doi.org/10.4161/epi.7.1.18814>

<http://www.landesbioscience.com/journals/epigenetics/article/18814>

**Supplementary table 1.** Primers for sequencing of the *BRCA1* 5' cis-regulatory region.

| Amplicon | Length (bp) | Forward primer (5'-3')<br>Reverse primer (5'-3')                              | Localization on human chromosome 17 (bps) <sup>a</sup> | Annealing temp. (°C) |
|----------|-------------|-------------------------------------------------------------------------------|--------------------------------------------------------|----------------------|
| 1        | 427         | <sup>b</sup> AGACGCTTGGCTCTTTCT<br><sup>c</sup> CTCGCGACCTACAAACTG            | 41.277.112-41.277.538                                  | 60                   |
| 2        | 334         | <sup>b</sup> CTTTGGACAATAGGTAGCGATTCT<br><sup>c</sup> CGCGCAGTCGCAGTTTAA      | 41.277.392-41.277.725                                  | 65                   |
| 3        | 402         | <sup>b</sup> TTAAGGCCTAGTTTCTGCTTTCAA<br><sup>c</sup> TGCATCACAGTAATTGCTGTACG | 41.277.673-41.278.046                                  | 65                   |
| 4        | 390         | <sup>b</sup> CCCGTTTCTCCGCGTTTT<br><sup>c</sup> GCGCGCTTGACTTGTCAACAGTT       | 41.277.971-41.278.360                                  | 65                   |
| 5        | 356         | <sup>b</sup> TGAACCACAGACTCTCCAACCTC<br><sup>c</sup> GAGCCAATCTTCTTGGCGAAAAC  | 41.278.325-41.278.680                                  | 65                   |
| 6        | 429         | <sup>b</sup> GAATTC AAGCGGGGTGCA<br><sup>c</sup> TTCGTGTTCTGAGGGACCGAGT       | 41.278.620-41.279.048                                  | 64                   |
| 7        | 512         | <sup>b</sup> GAGTGCTGACTGGTGCATATAAA<br><sup>c</sup> TCTGCTTGCGGGGAAGTG       | 41.278.834-41.279.345                                  | 64                   |
| 8        | 458         | <sup>b</sup> CCACCCACATCCTGTTGATT<br><sup>c</sup> GGGCTCCTGAGTCAGATGG         | 41.279.270-41.279.727                                  | 64                   |
| 9        | 339         | <sup>b</sup> ATGCAGTGGTGCAATCTGGG<br><sup>c</sup> CTGTCAAACGGACCAATTAGCTC     | 41.279.669-41.280.007                                  | 70                   |
| 10       | 440         | <sup>b</sup> TACAGCTCTTAAGGCGGCATG<br><sup>c</sup> ATATTAGCTGGGTGCGGTGGT      | 41.279.889-41.280.328                                  | 64                   |
| 11       | 358         | <sup>b</sup> GTCCGAAATTGGTGGGTTCTT<br><sup>c</sup> TTGGGTCCGCATAGCATTATCT     | 41.280.173-41.280.530                                  | 64                   |

---

<sup>a</sup>according to Ensemble release 64 (Sep. 2011)

<sup>b</sup>tagged with M13 sequence TGAAAACGACGGCCAGT

<sup>c</sup>tagged with M13 sequence CAGGAAACAGCTATGACC
